# Supplementary material for: Deletion of Vhl in Dmp1-Expressing Cells Causes Microenvironmental Impairment of B Cell Lymphopoiesis
Source: PubMed Central journal article supplement (PMC8889104; doi:10.3389/fimmu.2022.780945), 2022-02-16
Supplement: DataSheet_1.pdf [file DataSheet_1.pdf]

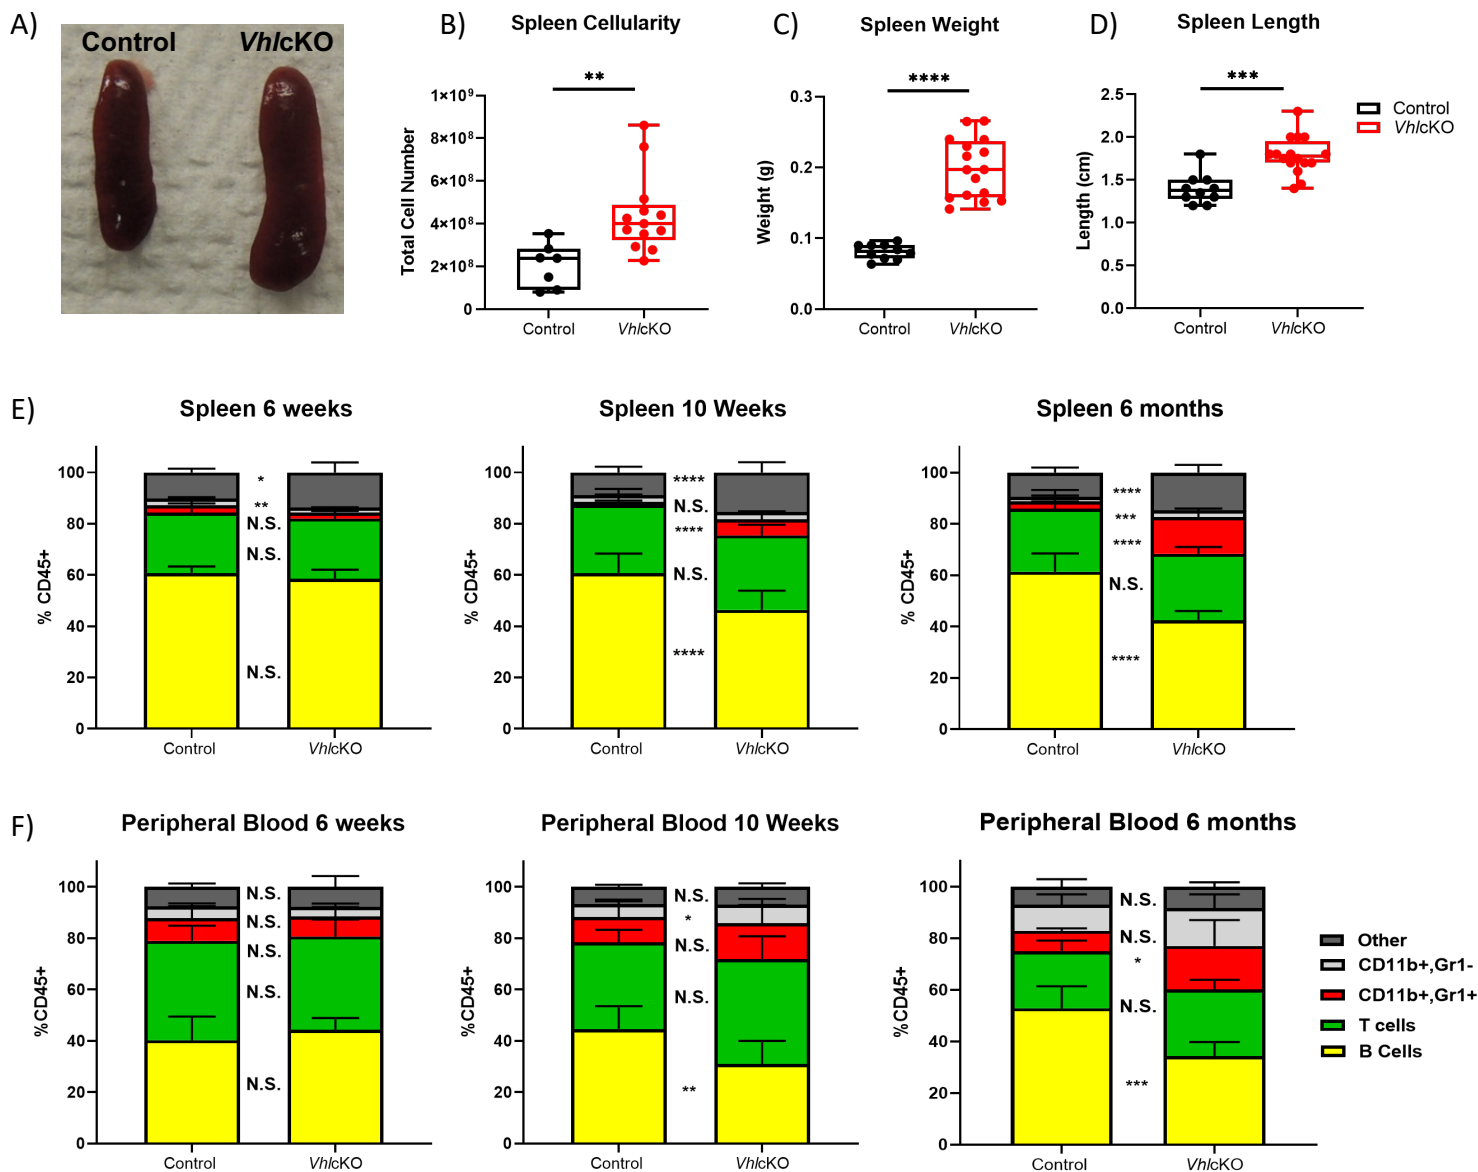

**Supplemental Figure 1. Analysis of hematopoietic lineages and cellularity in the spleen of *VhlcKO* mice.** A) White light image of spleens, scale bar: 1 cm; B) spleen cellularity; C) spleen weights; D) spleen length; E) spleen and F) peripheral blood lineage frequency at 6-weeks-old (left), 10-weeks-old (middle), and 6-months-old (right). \* $p < 0.05$ , \*\* $p < 0.01$ , \*\*\* $p < 0.001$ , \*\*\*\* $p < 0.0001$ , two-tailed Student's t-test.

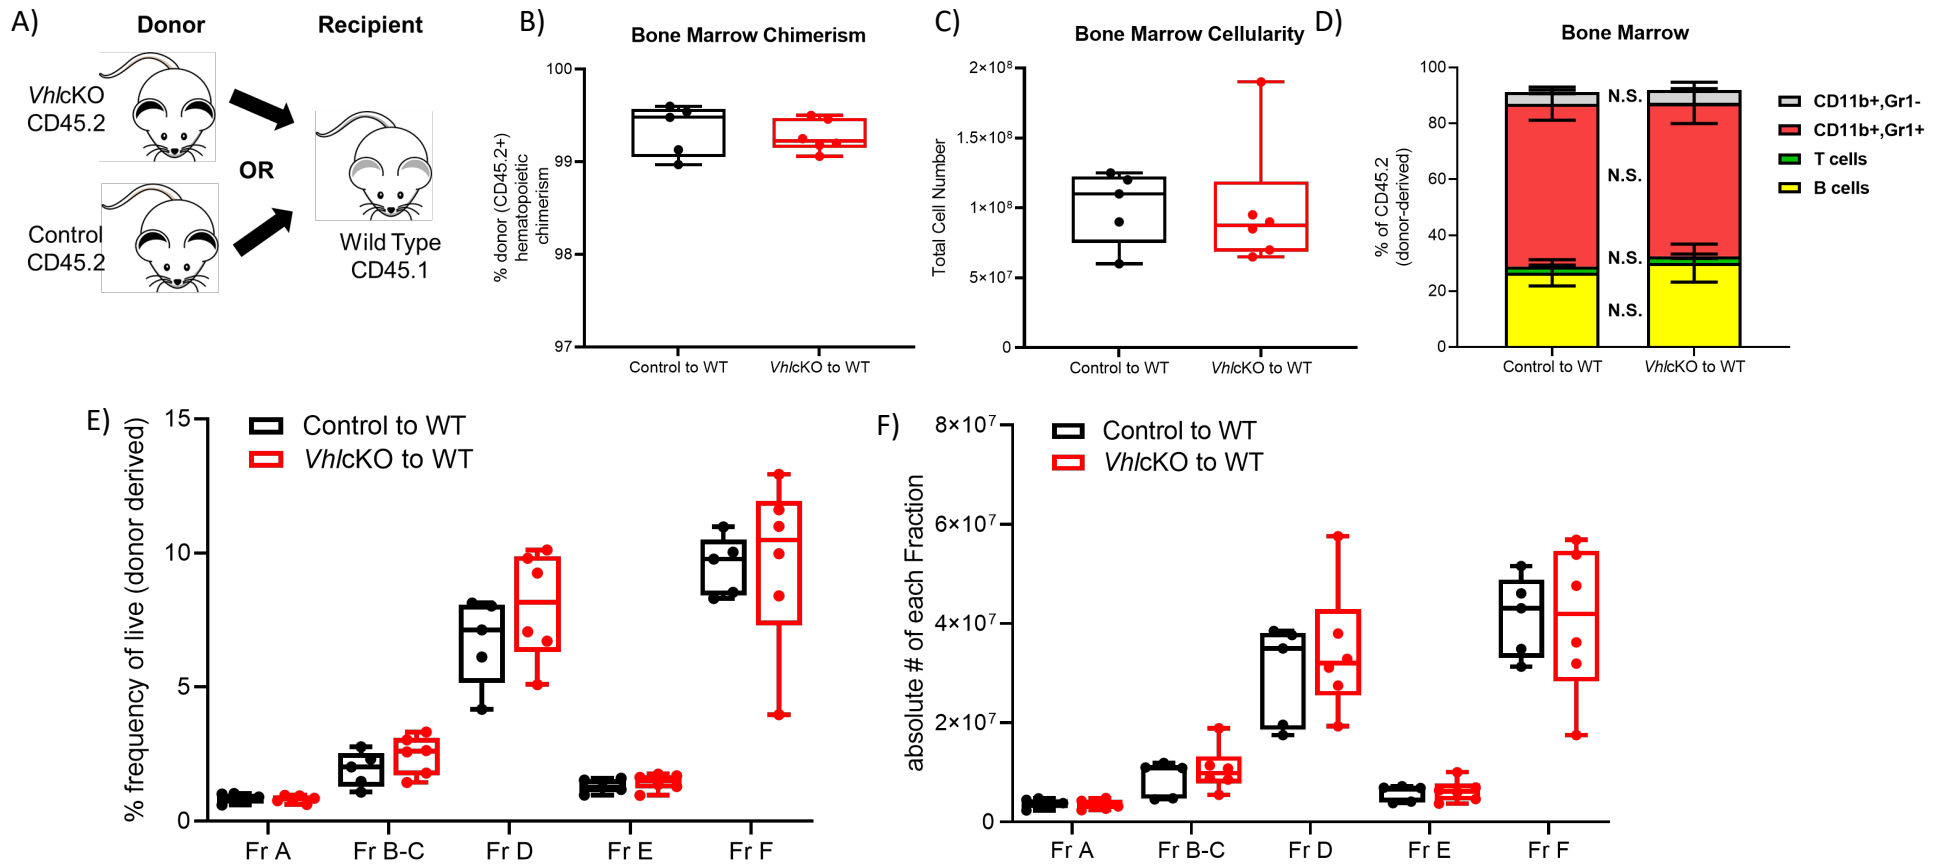

**Supplemental Figure 2. Evidence against cell-intrinsic effects of *Vhl* deletion on B cell development in *VhlcKO* mice.** A) Experimental scheme. Mice were transplanted at 10 weeks of age and were 26 weeks old at time of analysis. B) donor (CD45.2+) chimerism; C) bone marrow cellularity; D) frequency of lineage cells in bone marrow; E) frequency and F) absolute numbers of B cell developmental stages in chimeras 16 weeks post-transplant. N.S. not statistically significant; two-tailed Student's t-test.

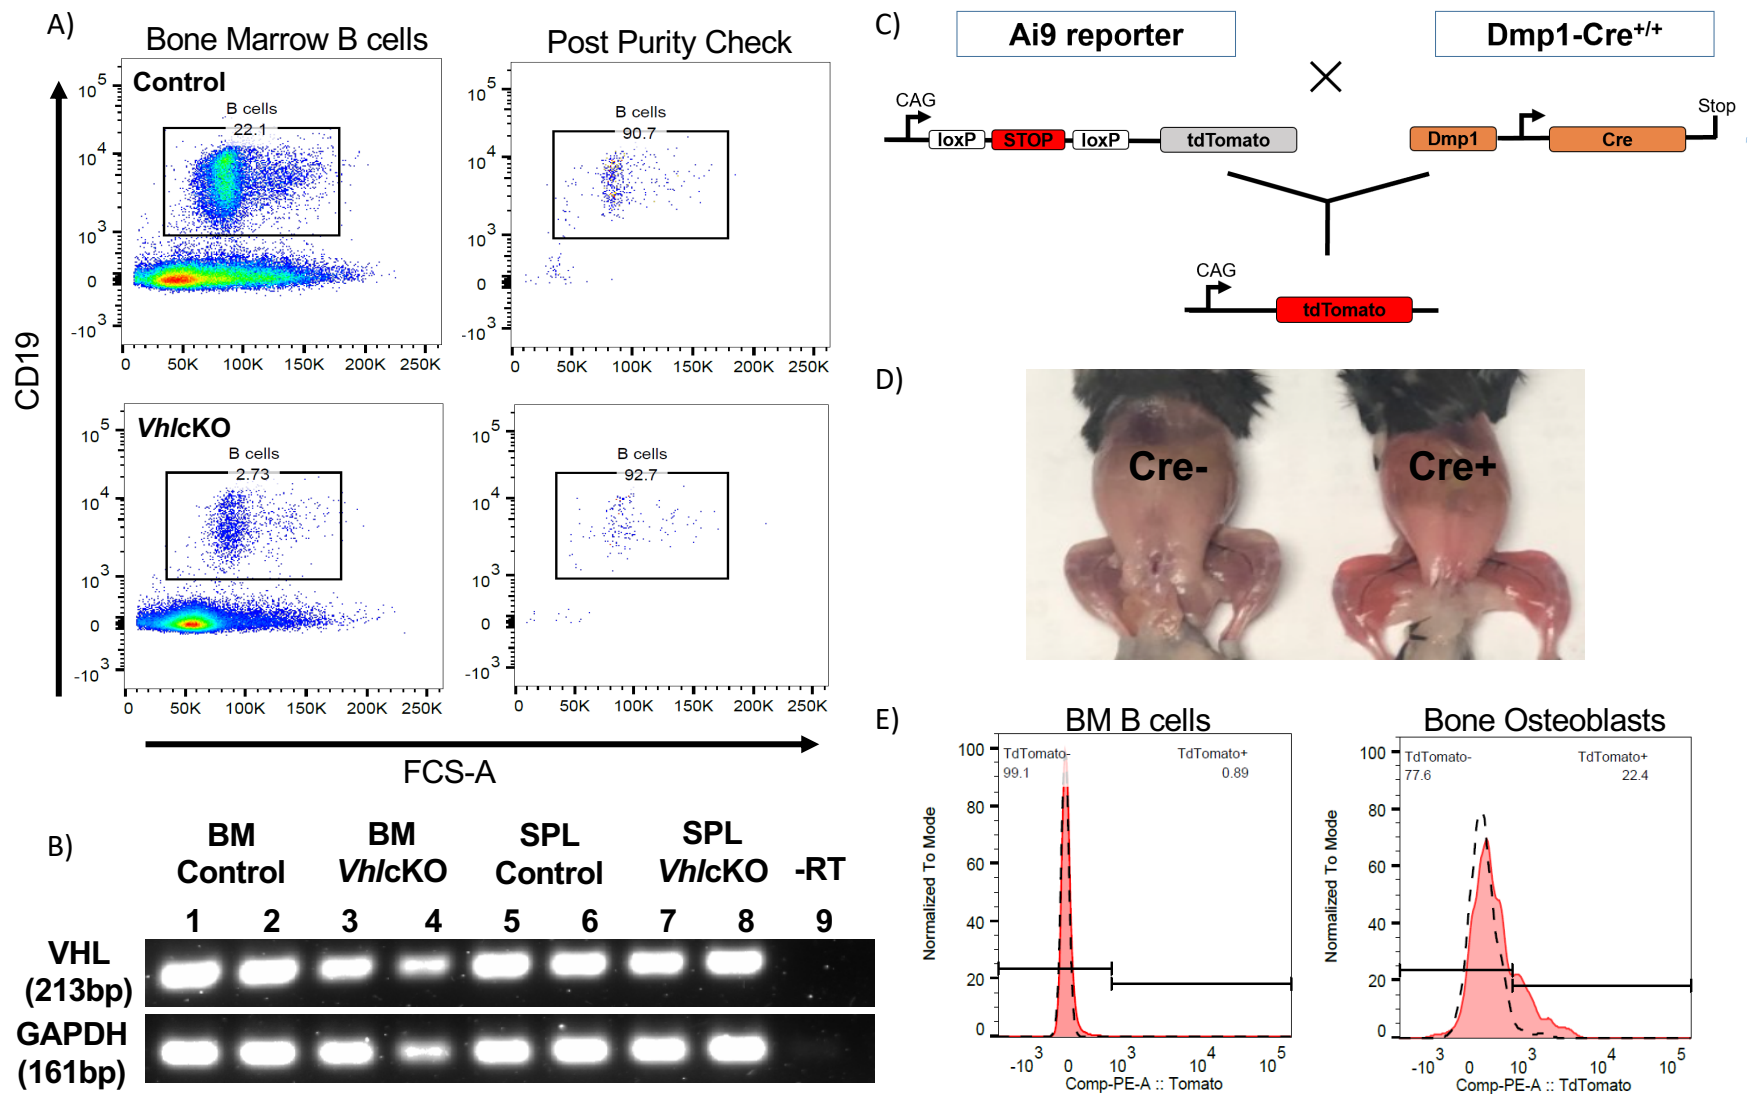

**Supplemental Figure 3. Validation of *Vhl* expression in B cells in *VhlcKO* mice and expression of *Dmp1-Cre* using Ai9 reporter mice** A) Bone marrow CD19<sup>+</sup> B lymphocyte percentages pre- and post- sorting from control and *VhlcKO* mice and B) PCR validation of *Vhl* and *Gapdh* gene expression in DNA of sorted B cells (Live, CD19<sup>+</sup>), demonstrating *Vhl* is intact in B cells in the *VhlcKO*; C) reporter cross of *Dmp1-Cre* mice with Ai9 (tdTomato) mice; D) tdTomato expression in *Dmp1-Cre*;Ai9 mice; E) flow cytometry measurement of tdTomato on BM B cells and osteoblasts (Lin<sup>-</sup>, CD45<sup>-</sup>, CD31<sup>-</sup>, Sca1<sup>-</sup>, CD51<sup>+</sup>) in *Dmp1-Cre*;Ai9 mice.

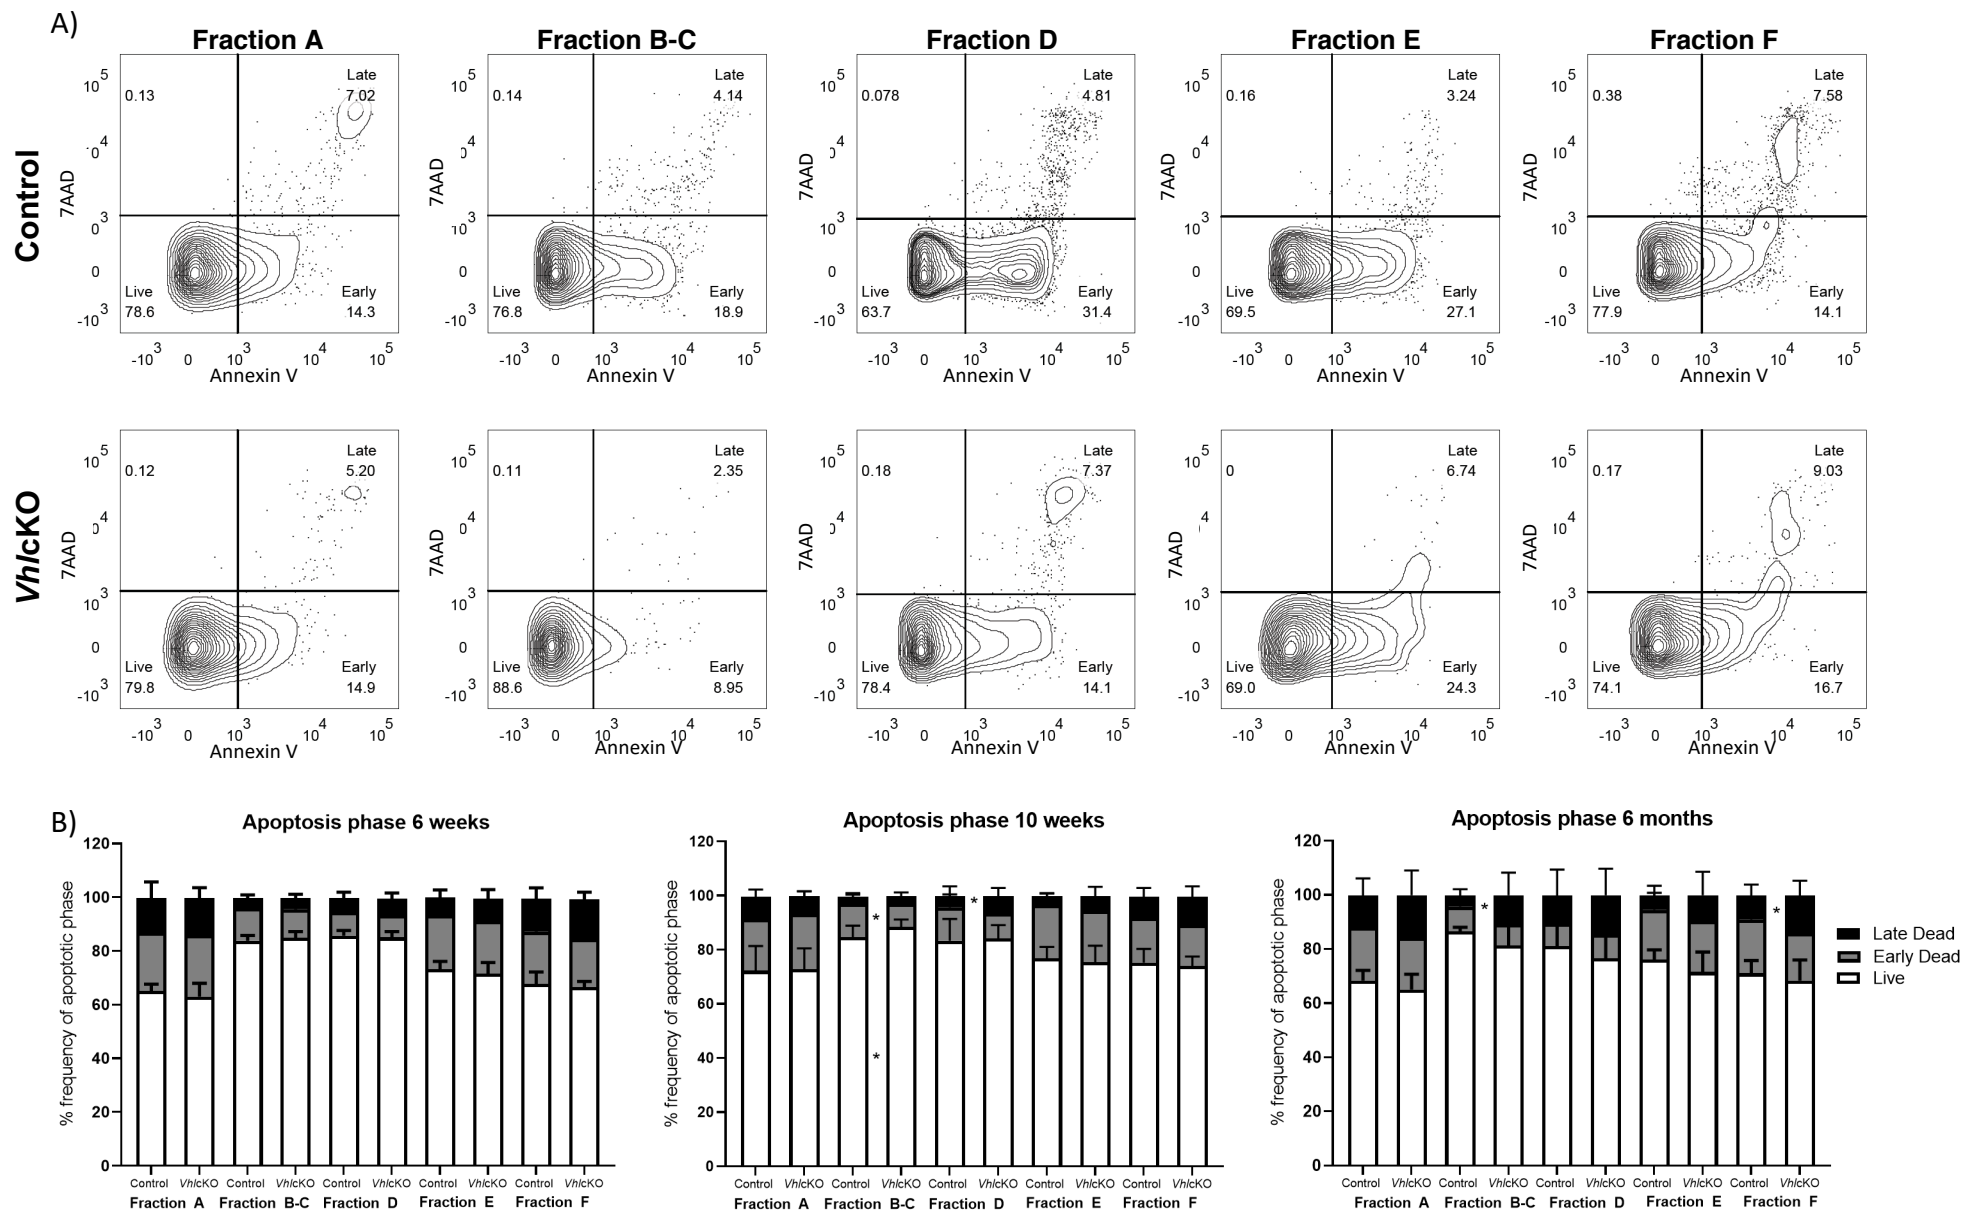

**Supplemental Figure 4. Apoptosis analysis of B cell Fractions A-F** A) Representative FACS plot of apoptotic phases in control (top) and *VhlcKO* (bottom) at 10-weeks-old; B) frequency of apoptotic phase in Fractions A-F in 6-weeks-old, 10-weeks-old and 6-month-old mice;  $p < 0.05^*$ ; two-tailed Student's t-test.

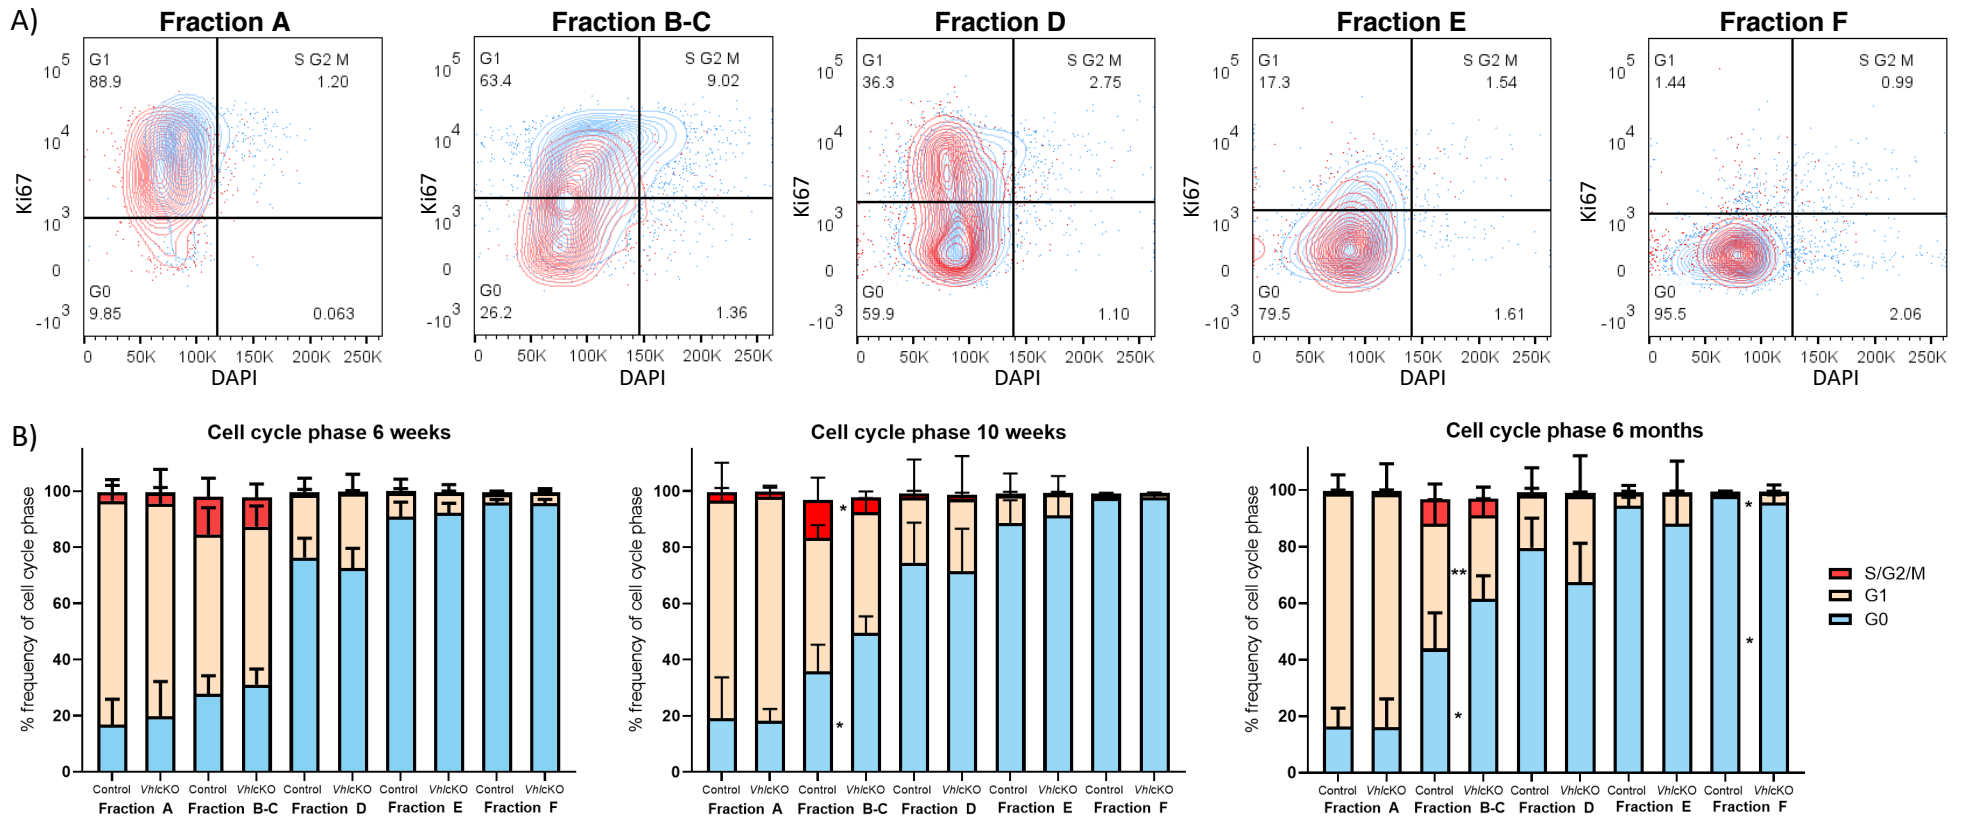

**Supplemental Figure 5. Proliferation analysis of B cell Fractions A-F** A) Representative FACS plot of cell cycle analysis in Fractions A-F cells (red: *VhlcKO* blue: control) in 10-weeks-old mice; B) frequency of cells in each cell cycle phase within Fractions A-F at 6-weeks-old, 10-weeks-old and 6-month-old mice.  $p < 0.05^*$ ,  $p < 0.01^{**}$ ; two-tailed Student's t-test.

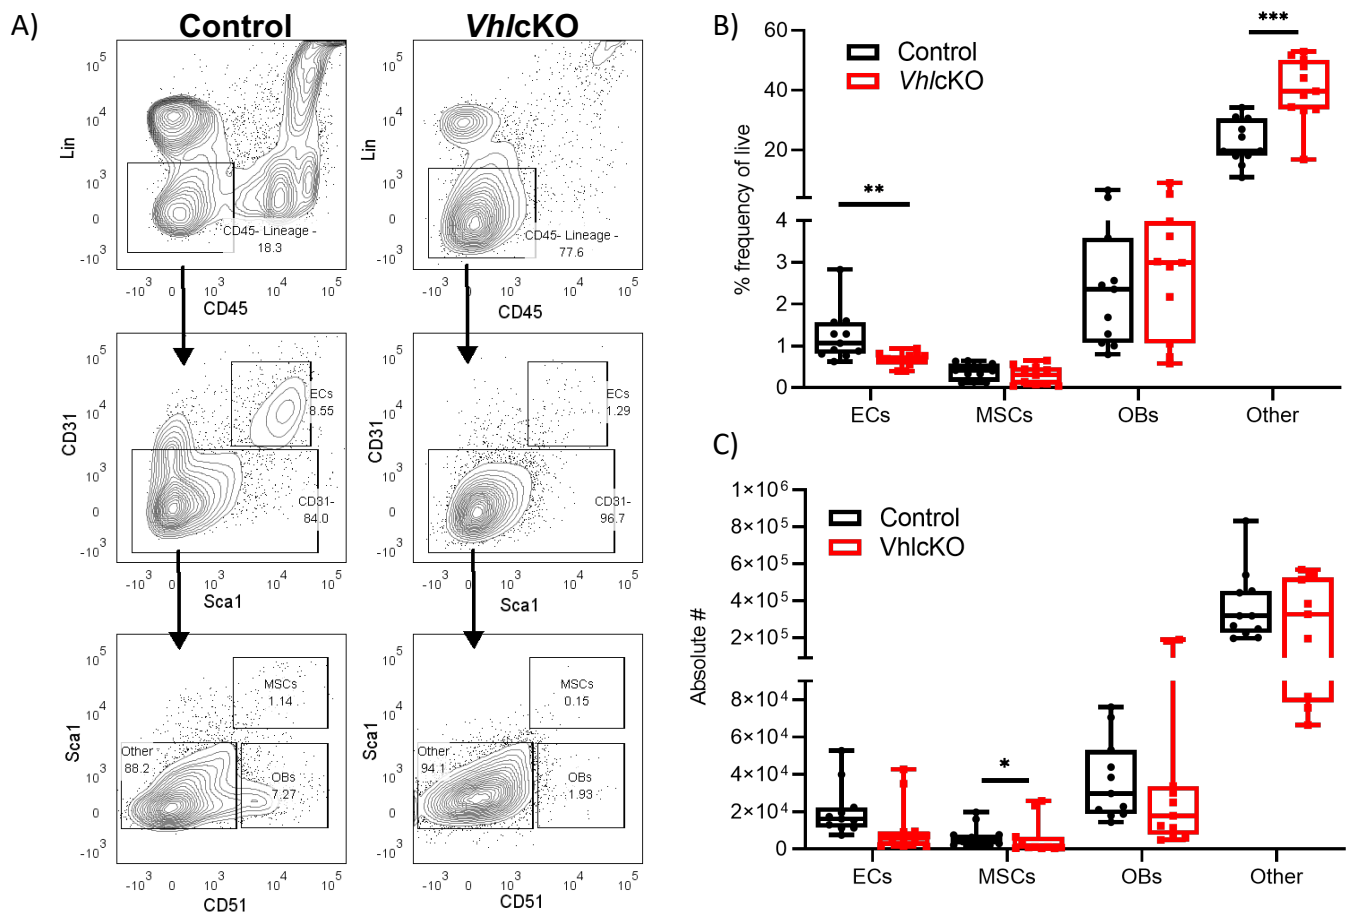

**Supplemental Figure 6. Flow cytometric analysis of *VhlcKO* bones.** A) Flow cytometry gating strategy for bone niche cells (ECs, MSCs, OBs) after 2hr bone digest; B) frequencies and C) absolute numbers of each cell subset out of the live cell gate (not shown).  $p < 0.05^*$ ,  $p < 0.01^{**}$ ,  $p < 0.001^{***}$  two-tailed Student's t-test.

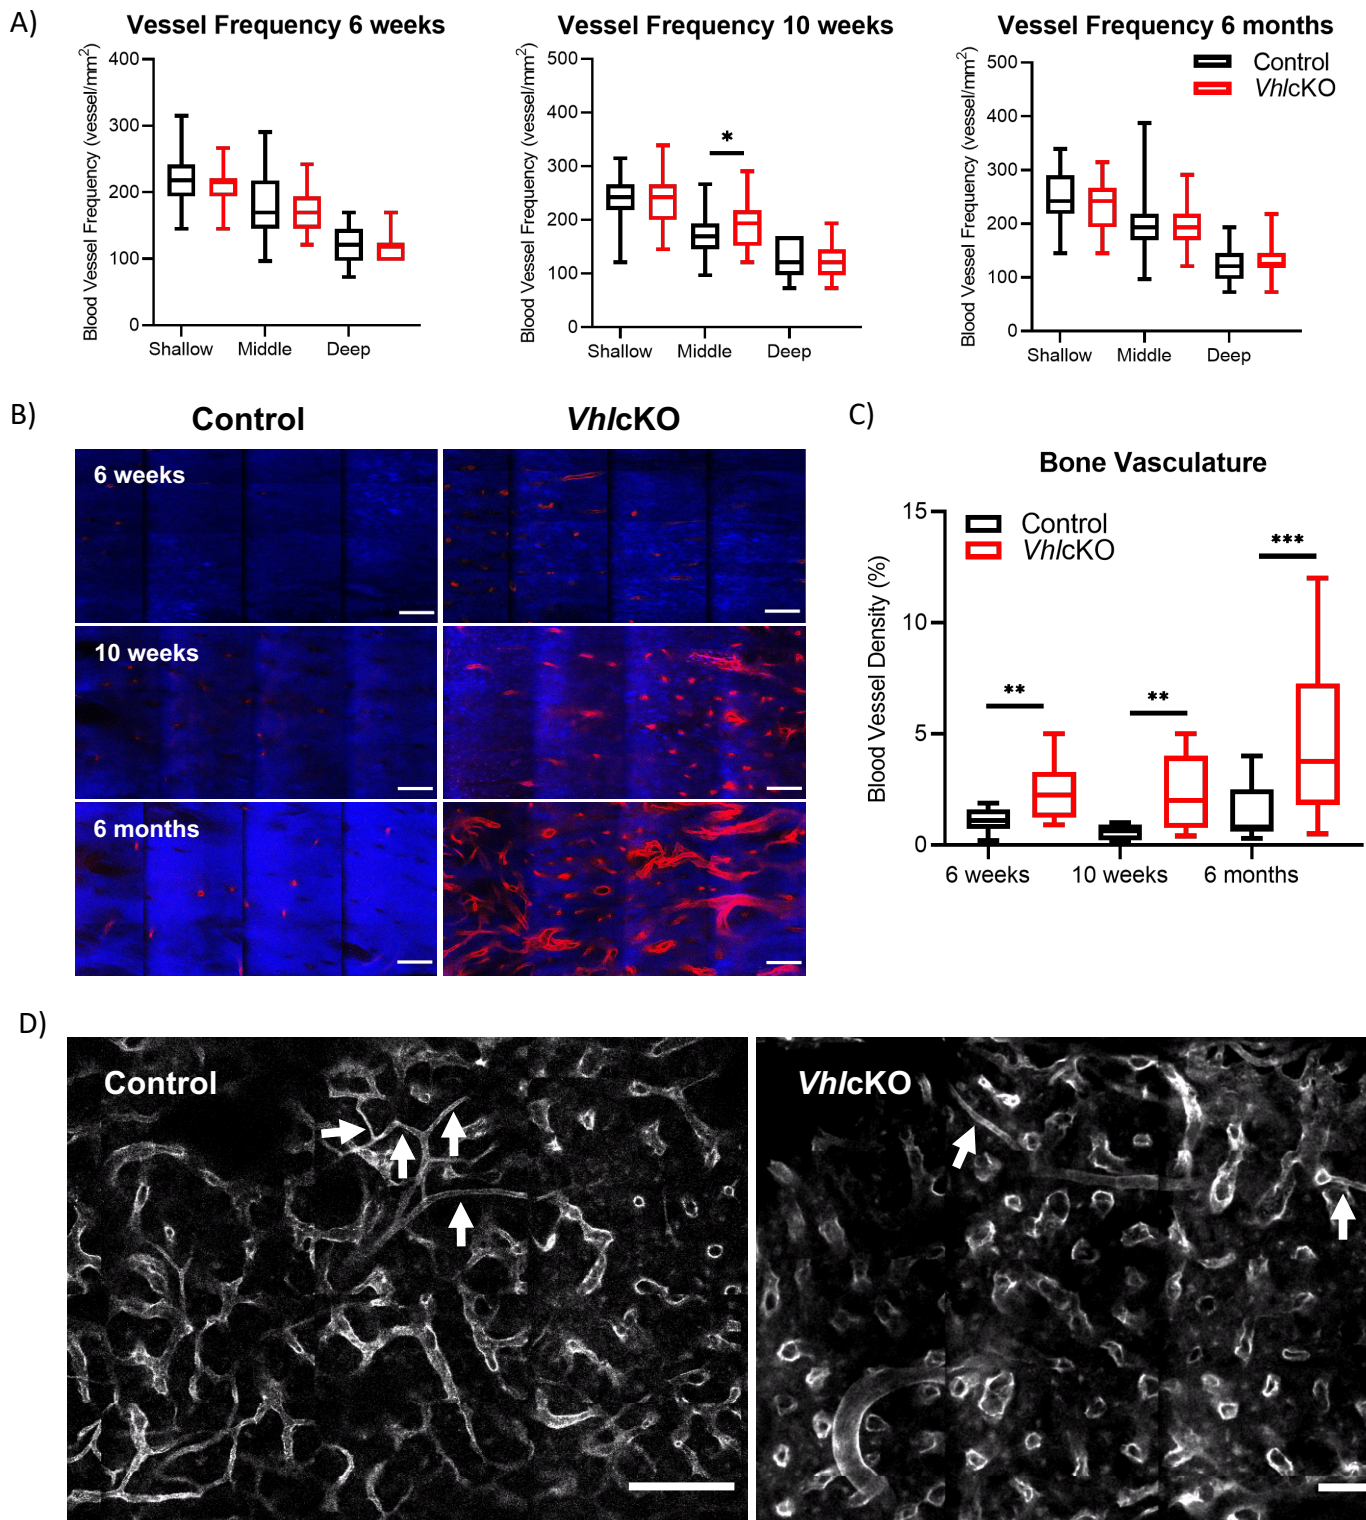

**Supplemental Figure 7. Ex vivo imaging of bone and bone marrow vasculature in *VhlcKO* and control mice.** A) Quantification of age dependent vessel frequency in the diaphyseal BM of uDISCO cleared femurs at different depths (0-30  $\mu\text{m}$  (shallow BM), 75-105  $\mu\text{m}$  (middle BM), and 150-180  $\mu\text{m}$  (deep BM) below the endosteum; B) maximum intensity projection images of cortical bone vascularization and C) quantification of cortical vessel density. Red: blood vessels (labeled with Alexa647 conjugated antibodies against CD31, CD144, and Sca-1), Blue: bone (SHG); D) maximum intensity projections of BM blood vessels within 50  $\mu\text{m}$  of the endosteum in femurs of control (left) and *VhlcKO* (right) mice; Grayscale: blood vessels (labeled with Alexa647 conjugated antibodies against CD31, CD144, and Sca-1). White arrows point to small diameter arterioles. Scale bars  $\sim 100 \mu\text{m}$ . \* $p < 0.05$ , \*\* $p < 0.01$ , \*\*\* $p < 0.001$ , two-tailed Student's t-test.

**Supplemental Table 1.** List of the fluorochrome-labeled monoclonal antibodies used for flow cytometry and vessel staining sorted by experimental cocktail

| Cocktail                             | Antigen               | Clone         | Fluorochrome      | Source            |
|--------------------------------------|-----------------------|---------------|-------------------|-------------------|
| Lineage Stain                        | CD45                  | 30F11         | FITC              | Biolegend         |
|                                      | CD19                  | 6D5           | PE                | Biolegend         |
|                                      | Gr1                   | RB6-8C5       | PE-Cy7            | Biolegend         |
|                                      | CD3                   | 145-2C11      | APC               | Biolegend         |
|                                      | CD11b                 | M1/70         | APC-Cy7           | Biolegend         |
|                                      | Propidium iodide (PI) |               | Viability Dye     | Sigma-Aldrich     |
| Hematopoietic Progenitor             | CD3                   | 145-2C11      | biotin            | Biolegend         |
|                                      | CD4                   | Gk1.5         | biotin            | Biolegend         |
|                                      | CD8                   | 53.6.7        | biotin            | Biolegend         |
|                                      | CD11b                 | M1/70         | biotin            | Biolegend         |
|                                      | CD19                  | 6D5           | biotin            | Biolegend         |
|                                      | Nk1.1                 | PK136         | biotin            | Biolegend         |
|                                      | Ter119                | TER119        | biotin            | Biolegend         |
|                                      | Gr1                   | RB6-8C5       | biotin            | Biolegend         |
|                                      | CD150                 | mShad150      | FITC              | eBioscience       |
|                                      | CD135 (Flk2)          | A2F10         | PE                | eBioscience       |
|                                      | CD48                  | HM48-1        | PE-Cy7            | Biolegend         |
|                                      | CD127                 | IL-7Ra        | APC               | Biolegend         |
|                                      | CD117 (cKit)          | 2B8           | APC-Cy7           | Biolegend         |
|                                      | Sca1 (Ly-6A/E)        | D7            | BV510             | Biolegend         |
|                                      | CD45                  | 30-F11        | PerCP Cy5.5       | Biolegend         |
| Streptavidin                         | -                     | Pacific Blue  | Life Technologies |                   |
| DAPI (4',6-diamidino-2-phenylindole) |                       | Viability Dye | Sigma-Aldrich     |                   |
| B cell Development                   | CD19                  | 6D5           | FITC              | Biolegend         |
|                                      | CD43                  | 1B11          | PE                | Biolegend         |
|                                      | B220                  | RA3-6B2       | PE-Cy7            | Biolegend         |
|                                      | IgD                   | 12-26c.2a     | BV510             | Biolegend         |
|                                      | IgM                   | RMM-1         | BV421             | Biolegend         |
|                                      | CD117 (cKit)          | 2B8           | APC-Cy7           | Biolegend         |
|                                      | Propidium iodide (PI) |               | Viability Dye     | Sigma-Aldrich     |
| Transplant Lineage Stain             | CD19                  | 6D5           | PE                | Biolegend         |
|                                      | Gr1                   | RB6-8C5       | PE-Cy7            | Biolegend         |
|                                      | CD3                   | 145-2C11      | APC               | Biolegend         |
|                                      | CD11b                 | M1/70         | biotin            | Biolegend         |
|                                      | Streptavidin          | -             | Pacific Blue      | Life Technologies |
|                                      | CD45.1                | A20           | FITC              | Biolegend         |
|                                      | CD45.2                | 104           | APC-Cy7           | Biolegend         |
| Propidium iodide (PI)                |                       | Viability Dye | Sigma-Aldrich     |                   |
| Transplant B cell development        | CD19                  | 6D5           | FITC              | Biolegend         |
|                                      | CD43                  | 1B11          | PE                | Biolegend         |
|                                      | B220                  | RA3-6B2       | PE-Cy7            | Biolegend         |
|                                      | IgD                   | 12-26c.2a     | BV510             | Biolegend         |
|                                      | IgM                   | RMM-1         | BV421             | Biolegend         |
|                                      | CD117 (cKit)          | 2B8           | APC-Cy7           | Biolegend         |
|                                      | CD45.1                | A20           | BUV395            | BD Horizon        |
|                                      | CD45.2                | 104           | APC               | Biolegend         |
| Propidium iodide (PI)                |                       | Viability Dye | Sigma-Aldrich     |                   |
| Apoptosis in B cell development      | CD43                  | 1B11          | PE                | Biolegend         |
|                                      | B220                  | RA3-6B2       | PE-Cy7            | Biolegend         |
|                                      | IgD                   | 12-26c.2a     | BV510             | Biolegend         |
|                                      | IgM                   | RMM-1         | BV421             | Biolegend         |
|                                      | CD117 (cKit)          | 2B8           | APC-Cy7           | Biolegend         |
|                                      | CD19                  | 6D5           | APC               | Biolegend         |
|                                      | CD45                  | 30-F11        | BUV395            | BD Horizon        |
|                                      | 7AAD                  | -             | 7AAD              | Biolegend         |
| Annexin V                            | -                     | FITC          | Biolegend         |                   |



|                                                |                                      |           |               |                   |
|------------------------------------------------|--------------------------------------|-----------|---------------|-------------------|
|                                                | IgG1, κ (Isotype Control)            | MOPC-21   | FITC          | Biolegend         |
| Proliferation Stain<br>Fractions A-C           | CD19                                 | 6D5       | FITC          | Biolegend         |
|                                                | CD43                                 | 1B11      | PE            | Biolegend         |
|                                                | B220                                 | RA3-6B2   | PE-Cy7        | Biolegend         |
|                                                | CD117 (cKit)                         | 2B8       | APC-Cy7       | Biolegend         |
|                                                | CD45                                 | 30-F11    | PerCP Cy5.5   | Biolegend         |
|                                                | Ki67                                 | 16A8      | APC           | Biolegend         |
|                                                | IgG2a,k (Isotype Control)            | RTK2758   | APC           | Biolegend         |
|                                                | DAPI (4',6-diamidino-2-phenylindole) |           | Viability Dye | Sigma-Aldrich     |
| Proliferation Stain<br>Fractions D-F           | IgD                                  | 11-26c.2a | FITC          | Biolegend         |
|                                                | CD43                                 | 1B11      | PE            | Biolegend         |
|                                                | IgM                                  | RMM-1     | PE-Cy7        | Biolegend         |
|                                                | B220                                 | RA3-6B2   | APC-Cy7       | Biolegend         |
|                                                | CD45                                 | 30-F11    | PerCP Cy5.5   | Biolegend         |
|                                                | Ki67                                 | 16A8      | APC           | Biolegend         |
|                                                | IgG2a,k (Isotype Control)            | RTK2758   | APC           | Biolegend         |
|                                                | DAPI (4',6-diamidino-2-phenylindole) |           | Viability Dye | Sigma-Aldrich     |
| Pimonidazole analysis of LSKs                  | CD3                                  | 145-2C11  | biotin        | Biolegend         |
|                                                | CD4                                  | Gk1.5     | biotin        | Biolegend         |
|                                                | CD8                                  | 53.6.7    | biotin        | Biolegend         |
|                                                | CD11b                                | M1/70     | biotin        | Biolegend         |
|                                                | CD19                                 | 6D5       | biotin        | Biolegend         |
|                                                | Nk1.1                                | PK136     | biotin        | Biolegend         |
|                                                | Ter119                               | TER119    | biotin        | Biolegend         |
|                                                | Gr1                                  | RB6-8C5   | biotin        | Biolegend         |
|                                                | Streptavidin                         | -         | Pacific Blue  | Life Technologies |
|                                                | CD45                                 | 30-F11    | PE            | eBioscience       |
|                                                | CD117 (cKit)                         | 2B8       | APC           | Biolegend         |
|                                                | Sca1 (Ly-6A/E)                       | D7        | BV510         | Biolegend         |
|                                                | B220                                 | RA3-6B2   | PE-Cy7        | Biolegend         |
|                                                | Fixable viability                    | -         | e780          | eBioscience       |
| anti-PIM                                       | -                                    | FITC      | HypoxyProbe   |                   |
| IgG1, κ (Isotype Control)                      | MOPC-21                              | FITC      | Biolegend     |                   |
| Pimonidazole analysis<br>of B cell development | CD19                                 | 6D5       | PECy5         | Biolegend         |
|                                                | CD43                                 | 1B11      | PE            | Biolegend         |
|                                                | B220                                 | RA3-6B2   | PE-Cy7        | Biolegend         |
|                                                | IgD                                  | 12-26c.2a | BV510         | Biolegend         |
|                                                | IgM                                  | RMM-1     | BV421         | Biolegend         |
|                                                | CD117 (cKit)                         | 2B8       | APC-Cy7       | Biolegend         |
|                                                | anti-PIM                             | -         | FITC          | HypoxyProbe       |
|                                                | IgG1, κ (Isotype Control)            | MOPC-21   | FITC          | Biolegend         |
| Imaging<br>antibodies                          | CD144                                | BV13      | Alexa647      | Biolegend         |
|                                                | CD31                                 | MEC13.3   | Alexa647      | Biolegend         |
|                                                | Sca1 (Ly-6A/E)                       | D7        | Alexa647      | Biolegend         |
| Bone digest stain                              | CD3                                  | 145-2C11  | PE-Cy7        | Biolegend         |
|                                                | CD4                                  | Gk1.5     | PE-Cy7        | Biolegend         |
|                                                | CD8                                  | 53.6.7    | PE-Cy7        | Biolegend         |
|                                                | CD11b                                | M1/70     | PE-Cy7        | Biolegend         |
|                                                | CD19                                 | 6D5       | PE-Cy7        | Biolegend         |
|                                                | Gr1                                  | RB6-8C5   | PE-Cy7        | Biolegend         |
|                                                | Nk1.1                                | PK136     | PE-Cy7        | Biolegend         |
|                                                | Ter119                               | TER119    | PE-Cy7        | Biolegend         |
|                                                | CD45                                 | 30F11     | BV421         | Biolegend         |
|                                                | CD31                                 | 390       | APC           | Biolegend         |
|                                                | Sca1 (Ly-6A/E)                       | D7        | BV510         | Biolegend         |
|                                                | CD51                                 | RMV-7     | Biotin        | Biolegend         |
|                                                | IgG1,k (Isotype Control)             | RTK2071   | Biotin        | Biolegend         |
|                                                | Streptavidin                         | -         | PE            | eBioscience       |
|                                                | Propidium iodide (PI)                |           | Viability Dye | Sigma-Aldrich     |
